# Supplementary material
Source: Springer Nature journal article supplement (https://www.springermedizin.de/resource/supplementary/12958_2008_417_MOESM1_ESM.pdf/9567834)

**A.**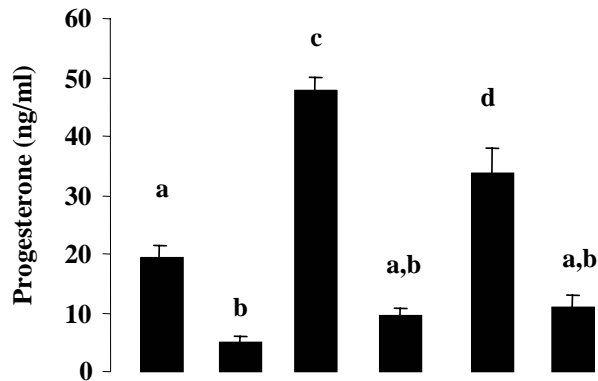

|         |   |   |   |   |   |   |
|---------|---|---|---|---|---|---|
| Glucose | - | + | - | + | - | + |
| FSH     | - | - | + | + | - | - |
| IGF-1   | - | - | - | - | + | + |

**B.**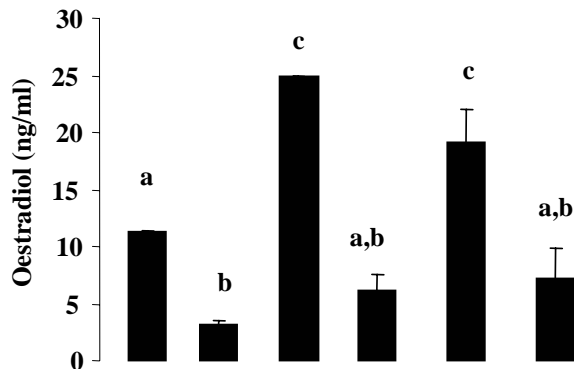

|         |   |   |   |   |   |   |
|---------|---|---|---|---|---|---|
| Glucose | - | + | - | + | - | + |
| FSH     | - | - | + | + | - | - |
| IGF-1   | - | - | - | - | + | + |

Supplement: MOESM1 [file 9567834]
